# Supplementary material for: One-Legged Balance Performance and Fall Risk in Mid and Later Life: Longitudinal Evidence From a British Birth Cohort
Source: PubMed Central journal article supplement (PMC10499759; doi:10.1016/j.amepre.2022.07.002), 2022-12
Supplement: mmc1.pdf [file mmc1.pdf]

**Appendix Figure 1.** Relative risk ratios, adjusted for individual health related indicators, per 1s increase in balance with eyes open at age A. 53 and recurrent falls at age 60-64 (n=2052); B. age 53 and recurrent falls at age 68 (n=2110); C. 60-64 and recurrent falls at age 68 (n=1920) [corresponding to Table 2, Model 5]

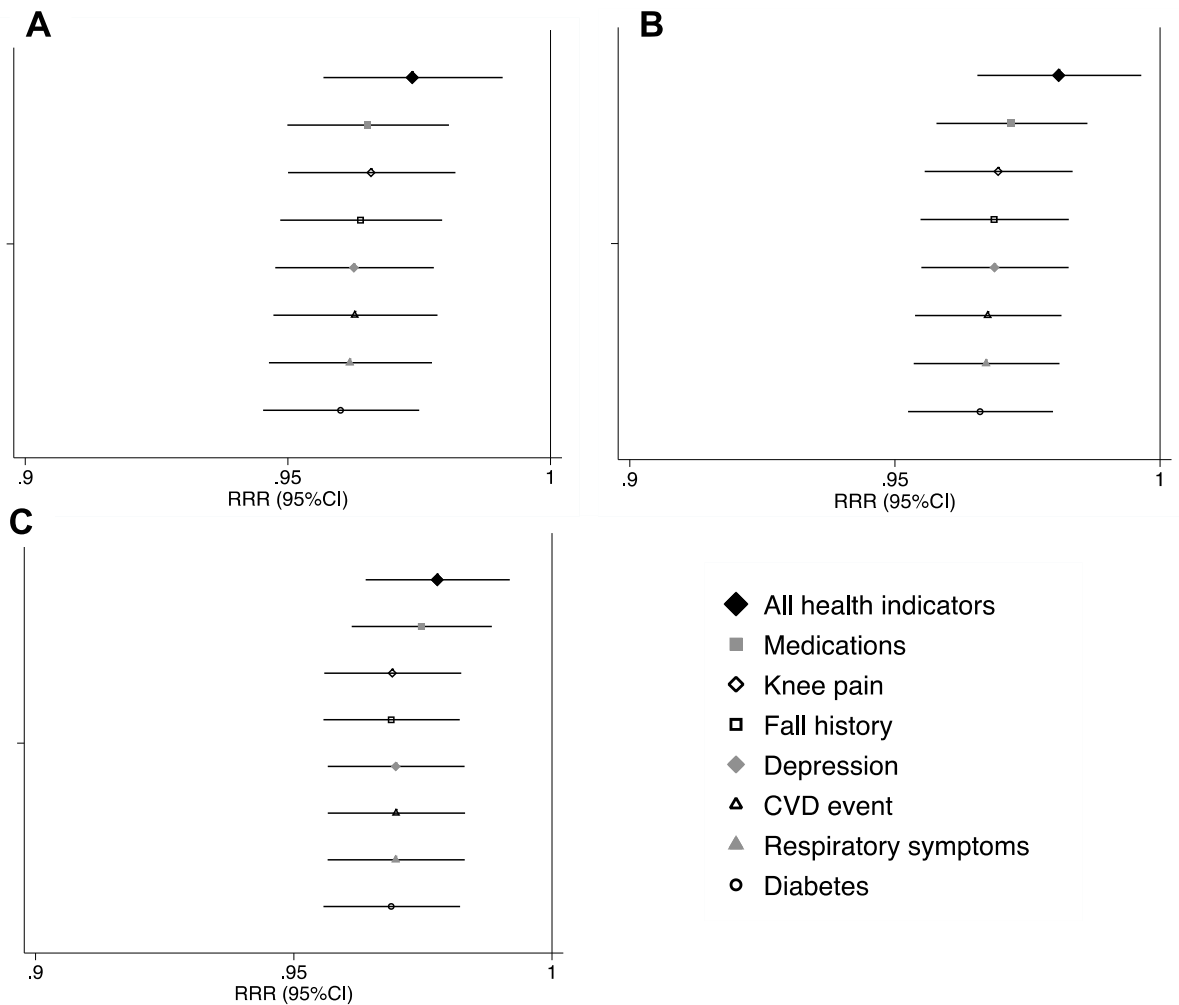

**Appendix Figure 2.** Relative risk ratios per 1s increase in balance with eyes open at age A. 53 and recurrent falls at age 60-64 (n=1793); B. age 53 and recurrent falls at age 68 (n=1855); C. 60-64 and recurrent falls at age 68 (n=1420) **in complete cases only**

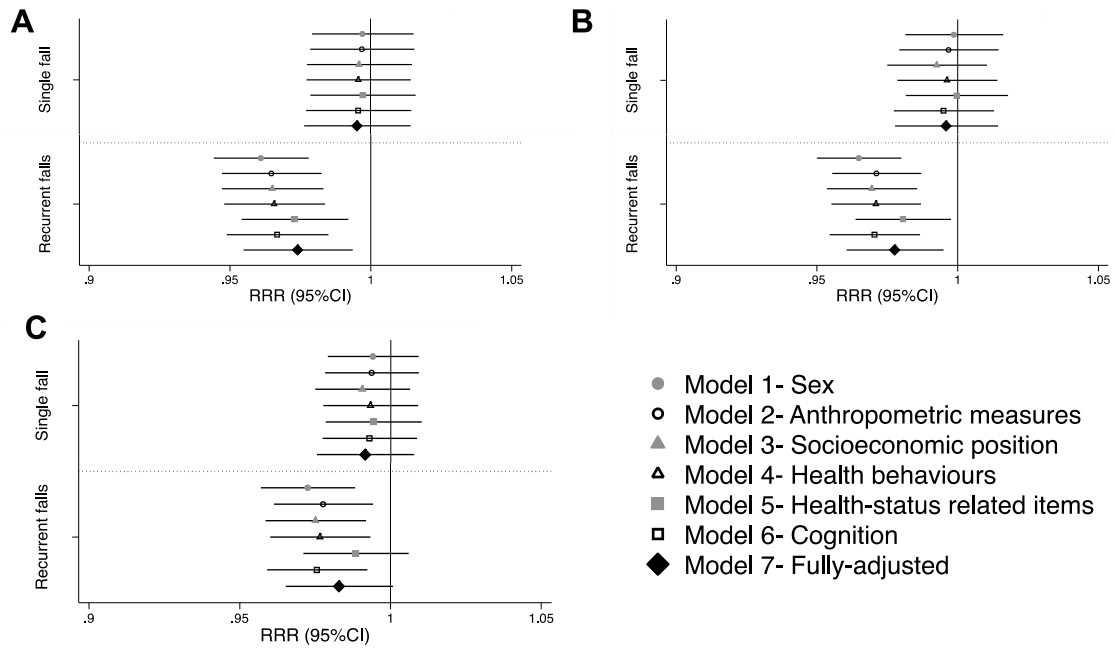

**Appendix Figure 3.** Relative risk ratios per 1s increase in balance with eyes open at age A. 53 and falls at age 60-64 (n=2061); B. 53 and falls at age 68 (n=2123); C. 60-64 and falls at age 68 (n=1866) **excluding those unable to perform the balance test due to health reasons who were assigned a time of 0s in main analyses**

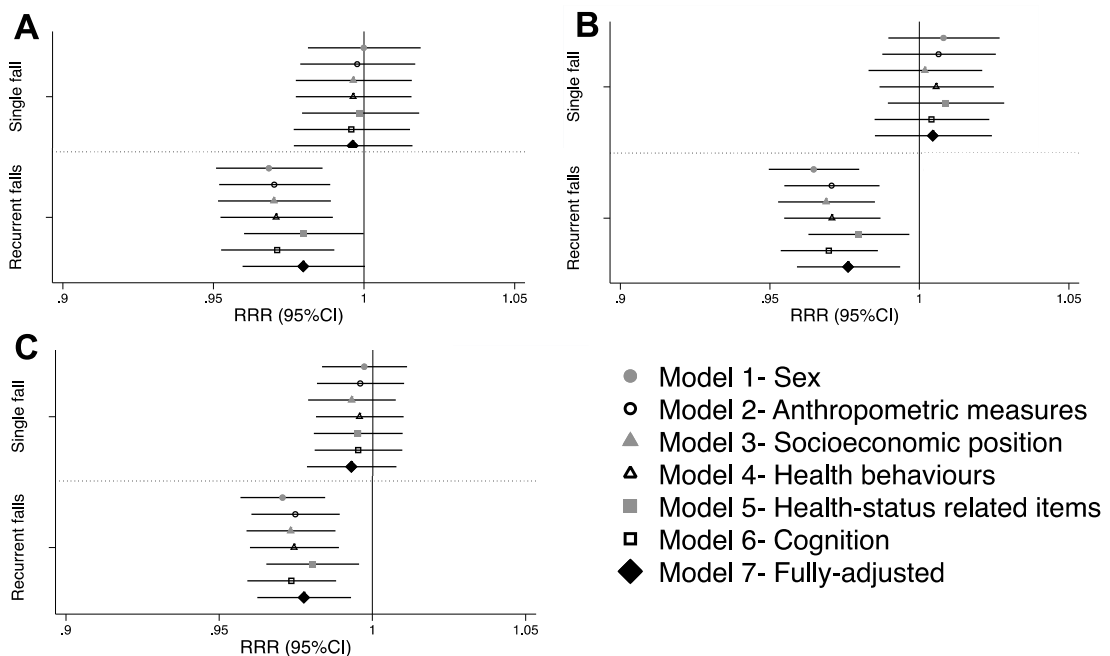

**Appendix Figure 4.** Relative risk ratios per 1s increase in balance with eyes open at age A. 53 and falls at age 60-64 (n=1975); B. 53 and falls at age 68 (n=2029); C. 60-64 and falls at age 68 (n=1549) **excluding those with a history of falling within the previous 12 months of balance assessment**

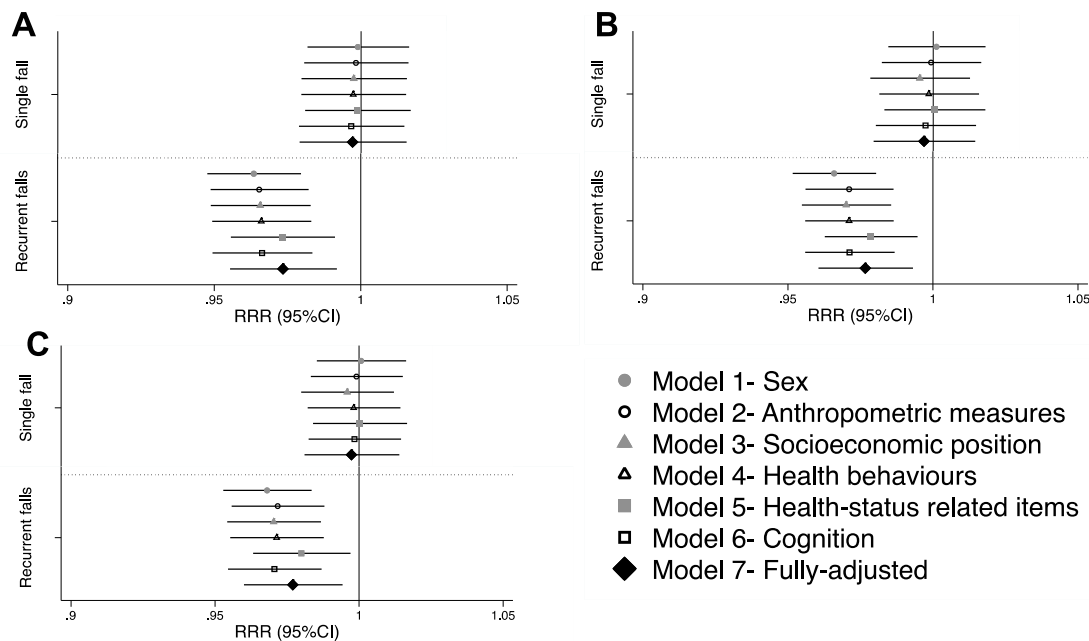

**Appendix Table 1.** Relative risk ratio indicating the association between change in balance (eyes open) from age 53 to 60-64 and single falls<sup>a</sup> at age 68

| Group                                   | Defined                                                        | Sex-adjusted model           | Fully-adjusted               |
|-----------------------------------------|----------------------------------------------------------------|------------------------------|------------------------------|
| <b>Stable high</b><br>(n=821;<br>44.9%) | Achieved 30s at ages 53 and 60-64                              | <i>Reference group</i>       | <i>Reference group</i>       |
| <b>Improved</b><br>(n=157;<br>8.6%)     | Improved from 0-14.99s to 15-30s or<br>from 15-29.99s to 30s   | 0.73 (0.40, 1.31)<br>p= 0.29 | 0.79 (0.43, 1.44)<br>p= 0.44 |
| <b>Declined</b><br>(n=638;<br>34.9%)    | Declined from 30s to 0-29.99s or from<br>15-29.99s to 0-14.99s | 1.00 (0.73, 1.38)<br>p=0.98  | 1.07 (0.76, 1.48)<br>p=0.71  |
| <b>Stable middle</b><br>(n=70; 3.8%)    | Recorded 15-29.99s at both ages                                | 0.87 (0.39, 1.99)<br>p= 0.75 | 1.00 (0.43, 2.33)<br>p= 0.99 |
| <b>Stable low</b><br>(n=141;<br>7.7%)   | Stayed in 0-14.99s group                                       | 1.09 (0.63, 1.92)<br>p= 0.76 | 1.22 (0.67, 2.21)<br>p= 0.52 |

<sup>a</sup>Estimates from multinomial logistic regression presented in Table 2

[Estimates greater than 1 suggest an increased risk, while estimates less than 1 suggest a reduced risk; statistical significance is indicated if 95% Confidence intervals do not cross 1.]
